# Supplementary material for: Enhanced oxidative and adsorptive removal of arsenite by the heterogeneous interfacial reaction of sulfidated nanoscale zerovalent iron
Source: Royal Society of Chemistry journal article supplement (doi:10.1039/d3en00271c), 2023-01-01
Supplement: d3en00271c1.pdf [file d3en00271c1.pdf]

# Enhanced oxidative and adsorptive removal of arsenite by heterogeneous interfacial reaction of sulfidated nanoscale zerovalent iron

Jing Liu<sup>a#</sup>, Siming Yang<sup>a#</sup>, Airong Liu<sup>a\*</sup>, Qing Huang, Wei-xian Zhang<sup>a</sup>, Shizhong Wang<sup>b</sup>,  
Qianfen Xiao<sup>a</sup>

<sup>a</sup>*State Key Laboratory for Pollution Control and Resource Reuse, College of  
Environmental Science and Engineering, Tongji University, Shanghai 200092, China*

<sup>b</sup>*School of Environmental Science and Engineering, Guangdong Provincial Key Lab of  
Environmental Pollution Control and Remediation Technology, Sun Yat-sen University,  
Guangzhou 510275, China*

---

#These two authors contributed equally: Jing Liu, Siming Yang.

\*To whom correspondence should be addressed. Tel: +86-21-6598-2684; Fax: +86-21-6598-3689  
E-mail address: liuairong@tongji.edu.cn (Airong Liu)

**Tab. S1** Pseudo-first-order and Pseudo-second-order kinetic model parameters

| Materials              | Pseudo-first-order     |                    |         | Pseudo-second-order                                    |                    |         |
|------------------------|------------------------|--------------------|---------|--------------------------------------------------------|--------------------|---------|
|                        | $k_1(\text{min}^{-1})$ | $q_e(\text{mg/g})$ | $R^2$   | $k_2(\text{g}\cdot\text{mg}^{-1}\cdot\text{min}^{-1})$ | $q_e(\text{mg/g})$ | $R^2$   |
| nZVI                   | 0.06091                | 5.804015           | 0.8741  | 0.020048                                               | 16.90617           | 0.99911 |
| S-nZVI <sup>0.01</sup> | 0.07425                | 1.312272           | 0.67052 | 0.108089                                               | 17.2117            | 0.99993 |
| S-nZVI <sup>0.1</sup>  | 0.05308                | 0.579112           | 0.54526 | <b>0.280152</b>                                        | <b>19.28268</b>    | 0.99999 |
| S-nZVI <sup>0.5</sup>  | 0.04738                | 2.654855           | 0.65549 | 0.060466                                               | 17.18508           | 0.99992 |

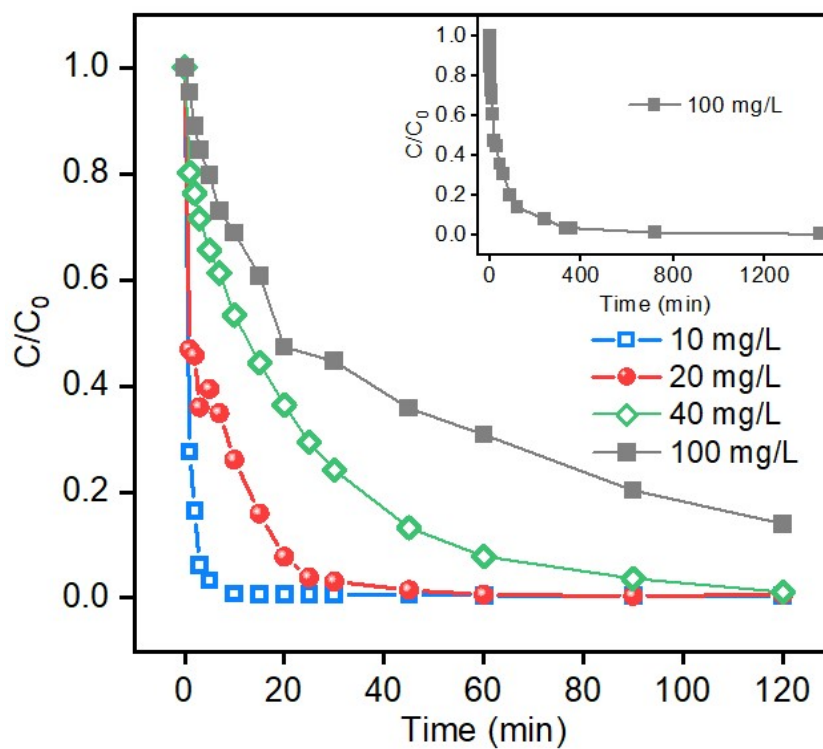

**Fig.S1** As(III) removal by S-nZVI under different initial As(III) concentration.

The insert figure in the top right-hand corner is the reaction time of 24 h.

Reaction conditions: the S-nZVI dose is  $0.5 \text{ g} \cdot \text{L}^{-1}$ ;  $[\text{As(III)}]_{\text{initial}} = 10 \text{ mg} \cdot \text{L}^{-1}$ ; the

$\text{pH}_{\text{initial}}$  is 5.

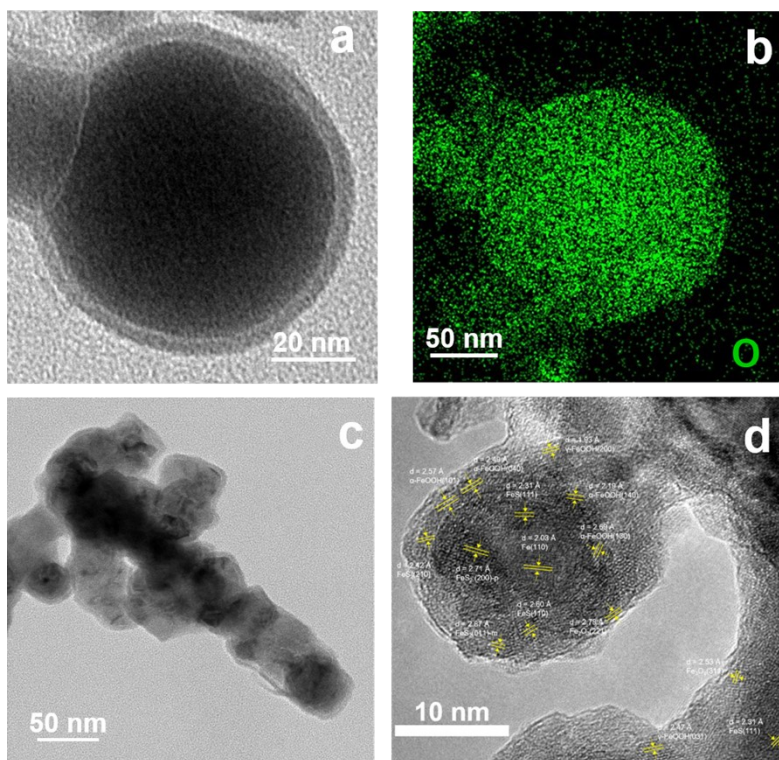

**Fig.S2** (a) TEM image of nZVI; ADF image (b) O mapping of S-nZVI; (c) TEM image of S-nZVI; (d) SAED pattern of S-nZVI.

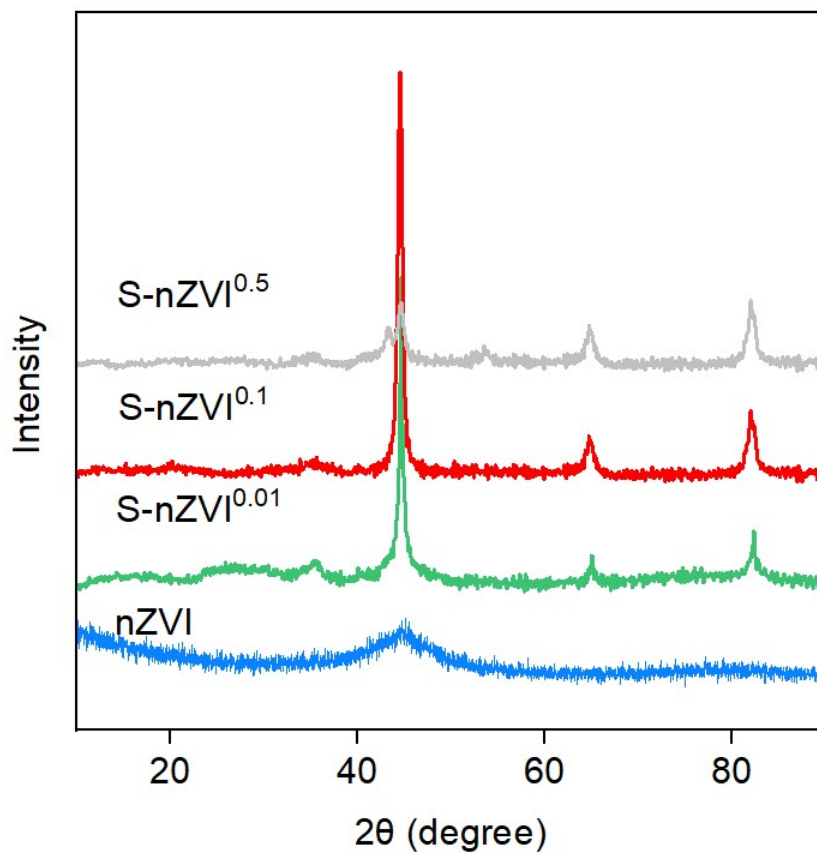

**Fig.S3** XRD patterns of S-nZVI at different S/Fe.

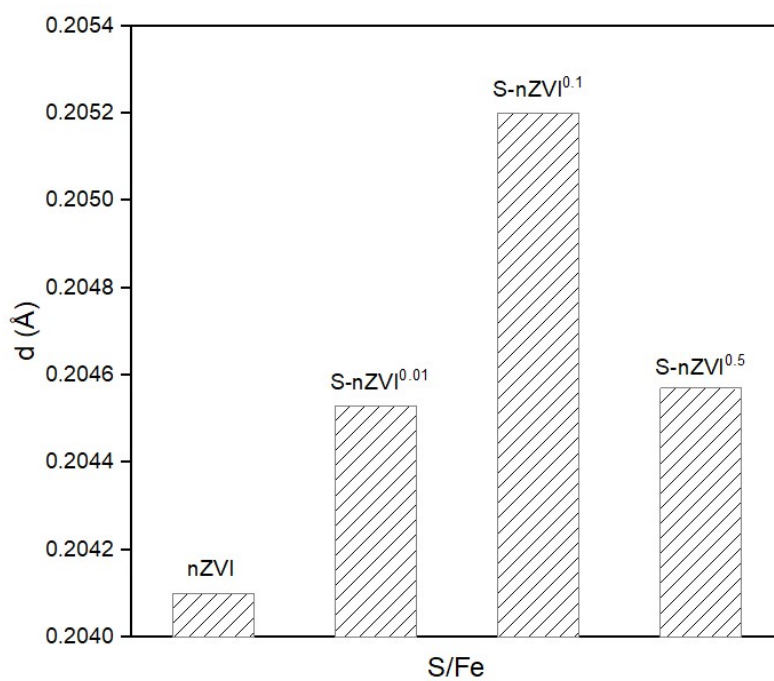

**Fig. S4** Crystal plane spacing of Fe (110) in S-nZVI.

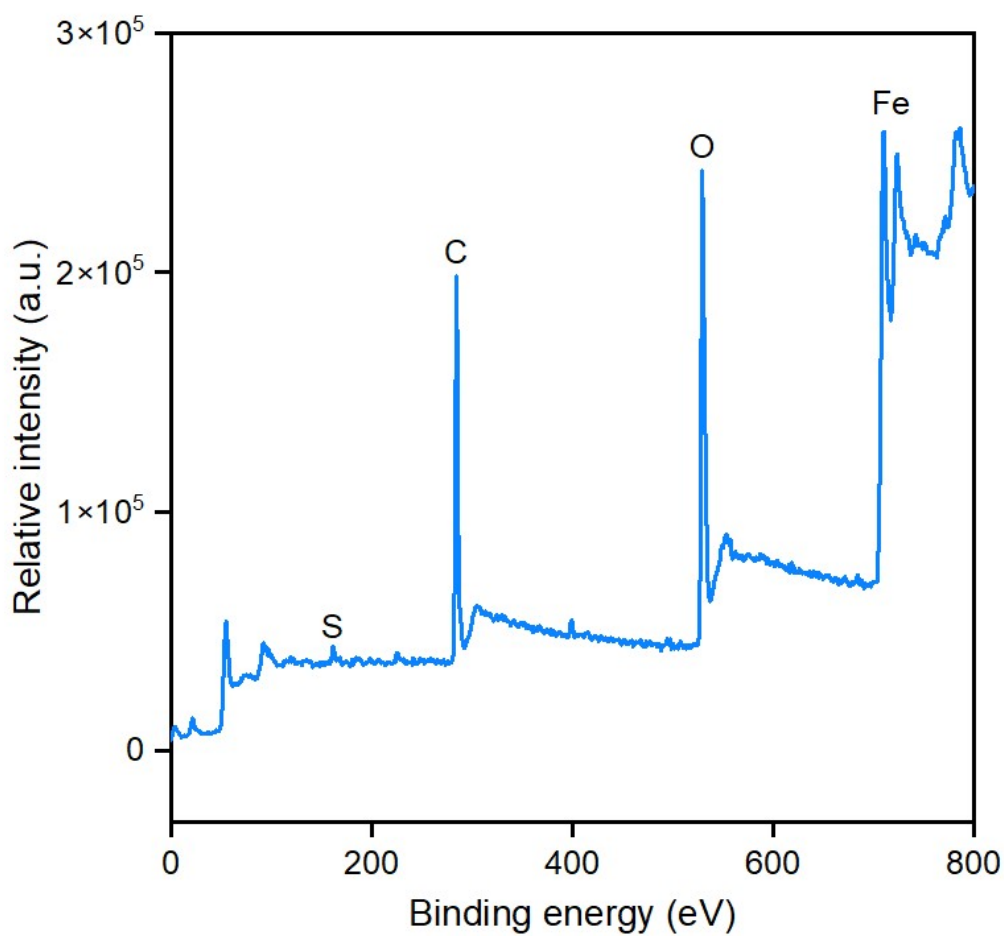

**Fig.S5** XPS survey spectra for S-nZVI.

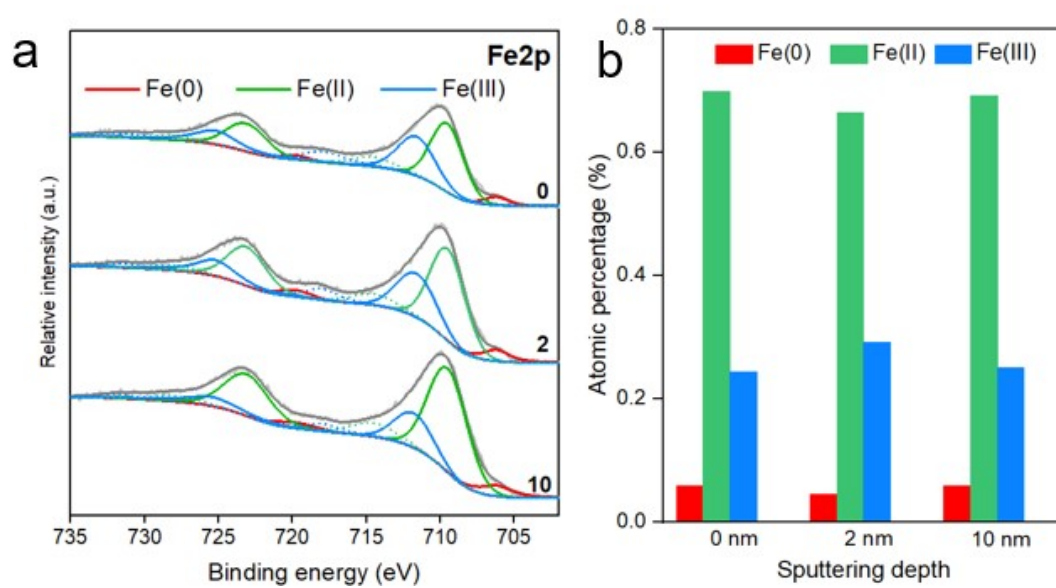

**Fig.S6** XPS spectra peaks for S-nZVI. (a) Fe2p, (b) Fe species distribution.

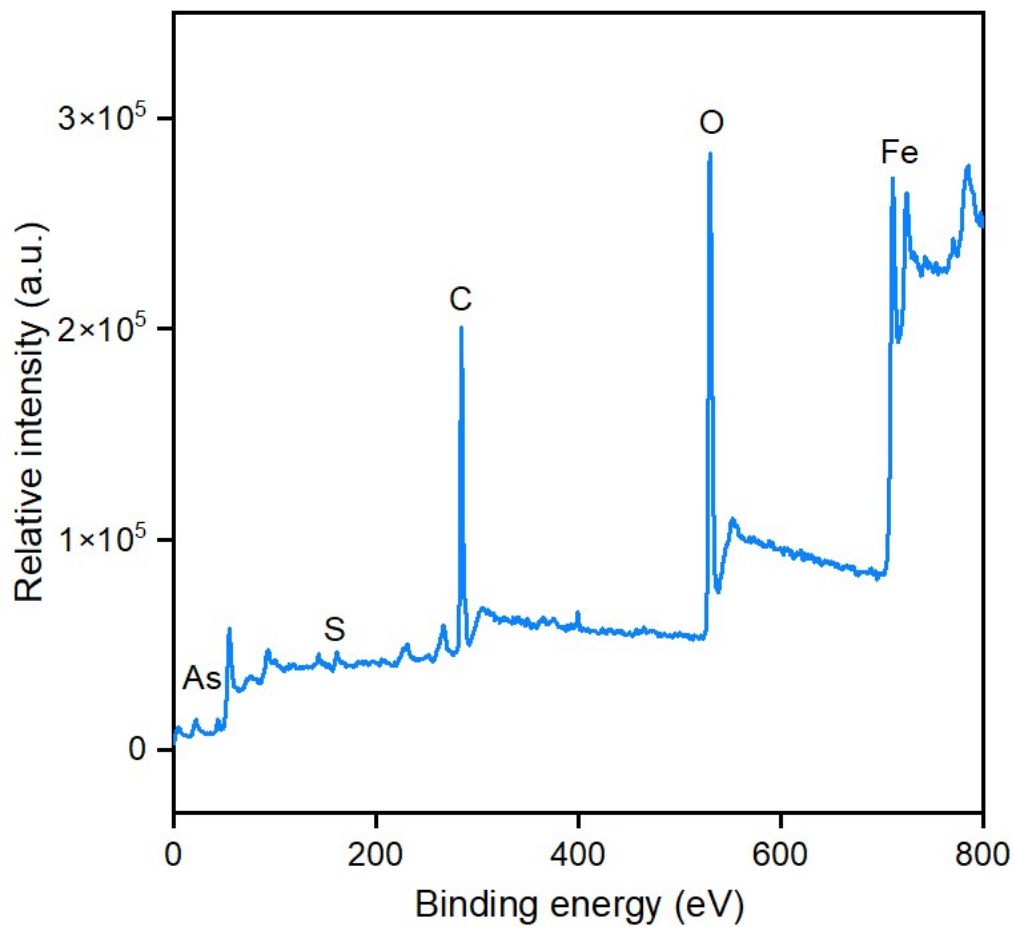

**Fig.S7** XPS survey spectra for S-nZVI reacted with As(III). Reaction conditions: the S-nZVI dose is  $5 \text{ g} \cdot \text{L}^{-1}$ ;  $[\text{As(III)}]_{\text{initial}} = 100 \text{ mg} \cdot \text{L}^{-1}$ ; the  $\text{pH}_{\text{initial}}$  is 5; and the reaction time is 24

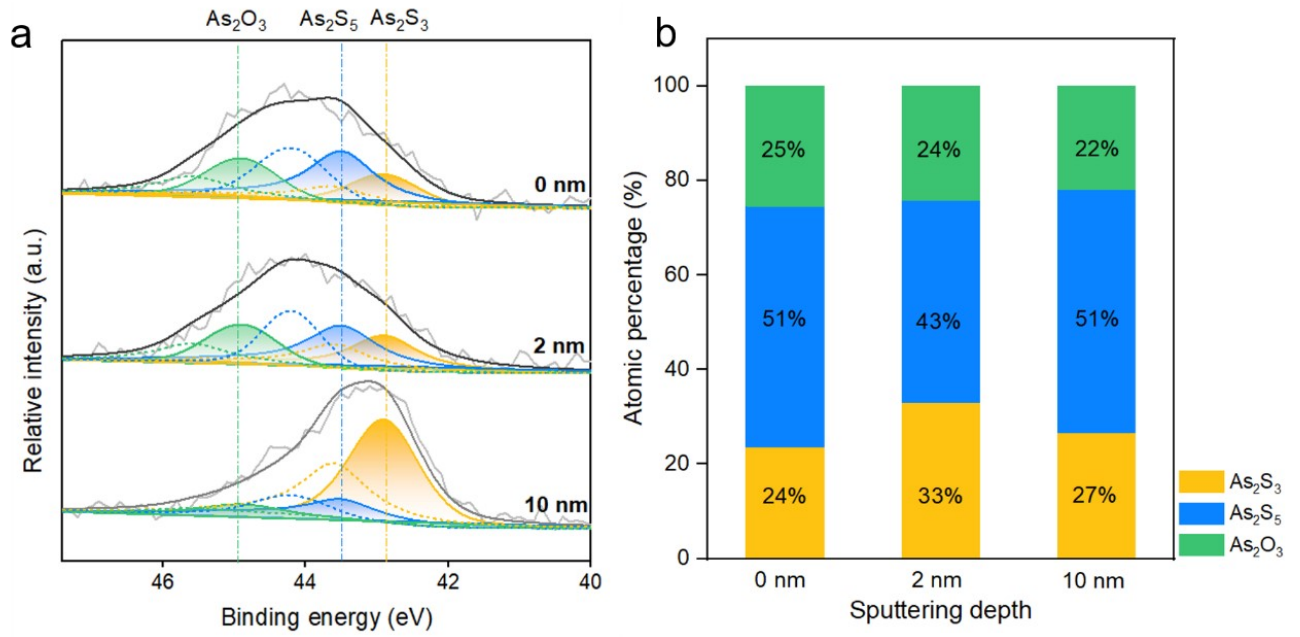

**Fig. S8** HR-XPS spectra of As3d peaks for S-nZVI reacted with As(III) at sputtering depths of 0, 2, 10 nm. (a) As3d species distribution; (b) Relative percentage of As species. Reaction conditions: the S-nZVI dose is  $5 \text{ g}\cdot\text{L}^{-1}$ ;  $[As(III)]_{\text{initial}}=100 \text{ mg}\cdot\text{L}^{-1}$ ; the  $\text{pH}_{\text{initial}}$  is 5; and the reaction time is 24 h.

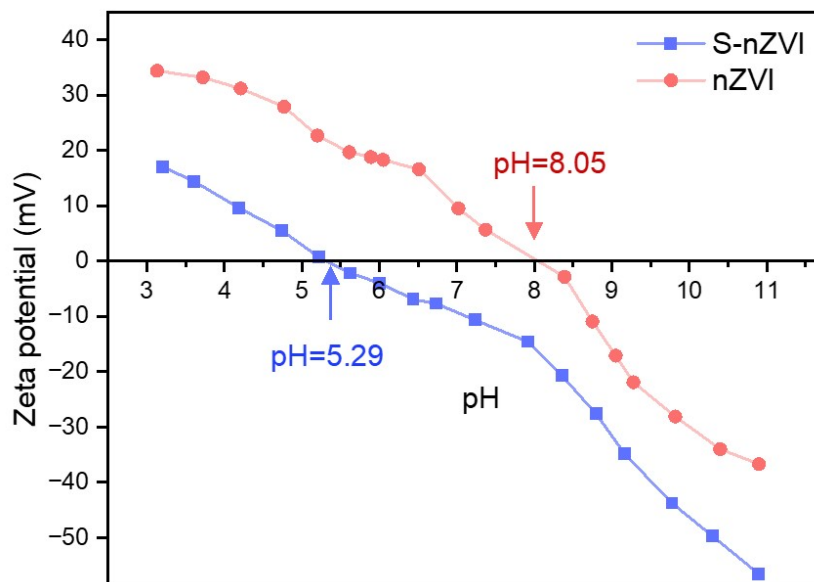

**Fig. S9** Zeta potential of nZVI and S-nZVI.



**Tab. S2** As species distribution of XPS spectra curve fitting for spent particles of S-nZVI / nZVI reacted with As(III)

| <b>Ion etching<br/>depth</b> | <b>Materials</b> | <b>As(V)</b> | <b>As(III)</b> | <b>As(0)</b> |
|------------------------------|------------------|--------------|----------------|--------------|
| 0 nm                         | S-nZVI           | 0.44855      | 0.55145        | /            |
|                              | nZVI             | 0.08228      | 0.57309        | 0.34463      |
| 2 nm                         | S-nZVI           | 0.3899       | 0.6101         | /            |
|                              | nZVI             | 0.10414      | 0.52084        | 0.37502      |
| 10 nm                        | S-nZVI           | 0.32224      | 0.67776        | /            |
|                              | nZVI             | 0.12545      | 0.50257        | 0.37198      |
